# Supplementary material
Source: Springer Nature journal article supplement (https://www.springermedizin.de/resource/supplementary/12885_2007_769_MOESM2_ESM.pdf/9470276)

## A Standard DC

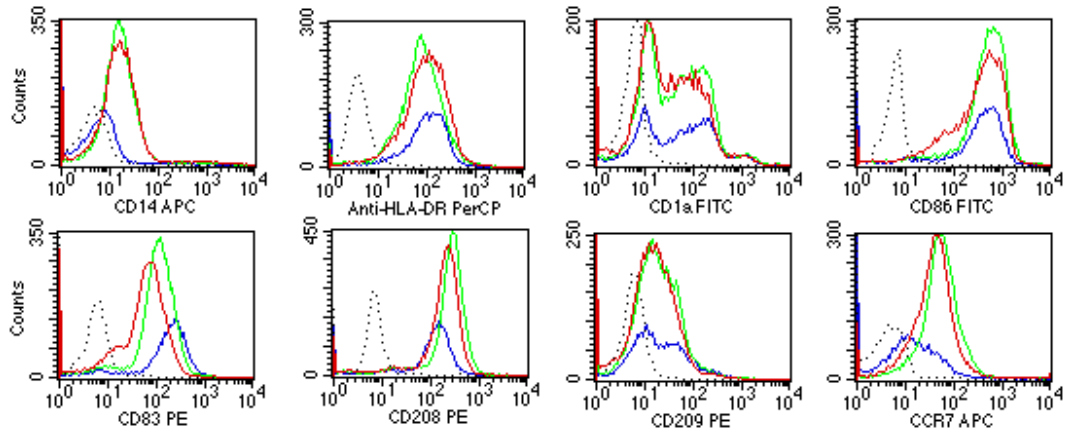

## B Fast DC

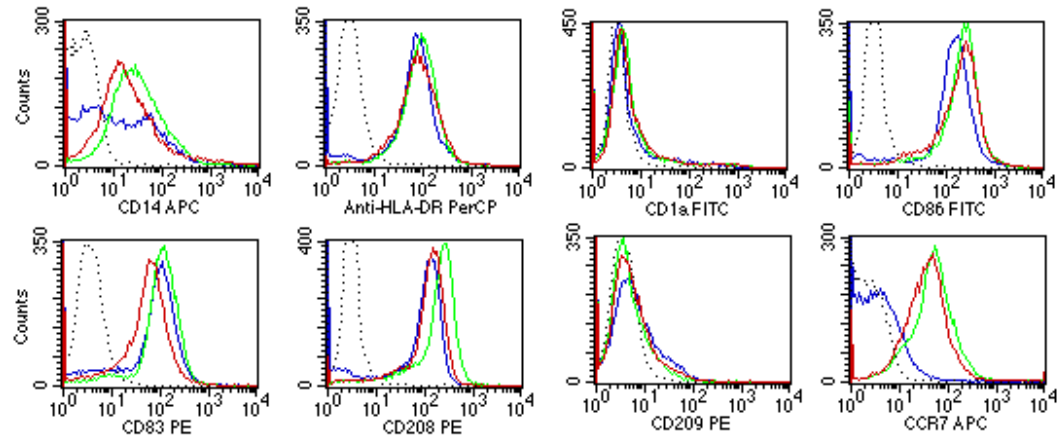

Supplement: MOESM2 [file 9470276]
